# Supplementary material
Source: Springer Nature journal article supplement (https://www.springermedizin.de/resource/supplementary/12889_2010_2806_MOESM7_ESM.pdf/9488884)
Supplement: MOESM7 [file 9488884]

1. *Is the study design appropriate to the research question?*
2. *Have attempts been made to minimise the biases associated with the selected study design?*
3. *Are the results precise?*
4. *Is the study valid?*
